# Supplementary material
Source: MDPI journal article supplement (https://www.mdpi.com/2313-0105/9/6/328)
Supplement: s1 [file s1]

## Supplementary Information

### Constructing a quasi-liquid interphase to enable highly stable Zn-metal anode

*Junzhang Wang<sup>a</sup>, Zhou Xu<sup>a</sup>, Tengting Qin<sup>a</sup>, Jintian Wang<sup>a</sup>, Rui Tian<sup>a</sup>, Xingzhong Guo<sup>a,b,\*</sup>, Zongrong Wang<sup>a</sup>, Zhongkuan Luo<sup>c</sup>, Hui Yang<sup>a, b</sup>*

<sup>a</sup> State Key Laboratory of Silicon and Advanced Semiconductor Materials, School of Materials Science and Engineering, Zhejiang University, Hangzhou 310058, China.

<sup>b</sup> Hangzhou Global Scientific and Technological Innovation Center, Zhejiang University, Hangzhou 311200, China.

<sup>c</sup> Zhejiang-California International Nanosystems Institute, Zhejiang University, Hangzhou 310058, China.

\*Corresponding E-mail: msewj01@zju.edu.cn

#### 1. Simulation details

The 2D numerical model was calculated by the module “Tertiary Current Distribution, Nernst-Planck” of COMSOL software. The diffusion coefficient of  $\text{Zn}^{2+}$  in the electrolyte of 2 M  $\text{ZnSO}_4$  was set to  $2 \times 10^{-9} \text{ m}^2 \text{ s}^{-1}$ . The cathode was set as the upper boundary of the 50  $\mu\text{m}$  electrolyte. A coating with 5  $\mu\text{m}$  thickness was on the anode surface, where the gap was filled with 0.25  $\mu\text{m}$  electrolyte. The diffusion coefficient of  $\text{Zn}^{2+}$  in the coatings was set to  $2 \times 10^{-10} \text{ m}^2 \text{ s}^{-1}$ .

To create non-uniformity in the coating, the diffusion coefficient of  $\text{Zn}^{2+}$  in the coating was spatially modified according the Gaussian function as follows: [1]

$$g1(x) = \exp\left(\frac{-x^2}{2\sigma^2}\right) \quad (\text{Equation S1})$$

$$\sigma = \frac{5 \times 10^{-6} \text{ m}}{2\sqrt{2\ln 2}} \quad (\text{Equation S2})$$

Where the full-width half-maximum of the coating was 5  $\mu\text{m}$ , and the maximum amplitude at the center is  $2 \times 10^{-9} \text{ m}^2 \text{ s}^{-1}$ . To give the coating a self-adaptive dynamic behavior, a feedback mechanism

was added to the spatially varying Gaussian conductivity profile. The Gaussian distribution was attenuated by a factor of  $e^{-A\Delta V}$ , where A is a scaling factor and  $\Delta V$  is the volume change of each mesh element in the coating with Zn metal deposition. The overpotential was set to -135 mV (vs.  $\text{Zn}/\text{Zn}^{2+}$ ) at the Zn anode.

For comparison, the same parameters were used for electrodes with a SSI. Moreover, we introduced ellipses (long diameter 2.5  $\mu\text{m}$ , short diameter 1.25  $\mu\text{m}$ ) filled with electrolyte or air. For the rigid SSI, a 5  $\mu\text{m}$  pinhole was introduced to generate non-uniformity as a control. For the anode without coating, the initial bumps were introduced since the dendrite growth mainly depends on the surface roughness. This is a typical dendritic evolution problem, where the Butler-Volmer current density  $i_{BV}$  is regulated by a rate modification factor S [2].

## 2. Supporting Figures

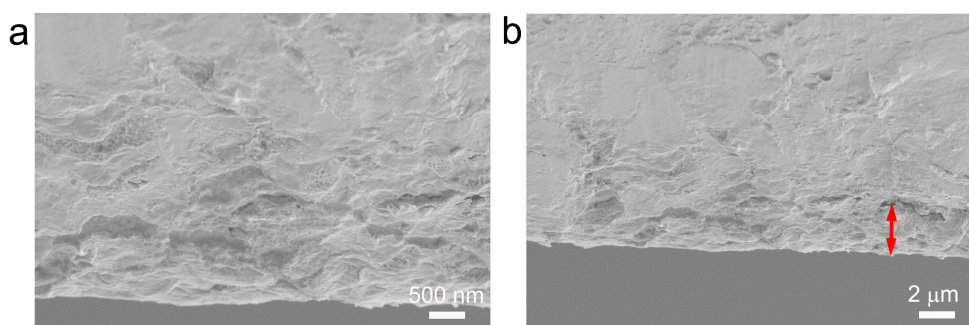

**Figure S1.** SEM images of Zn@QLI in the cross-section direction, indicating the thickness of the modified layer is  $\sim 3 \mu\text{m}$ .

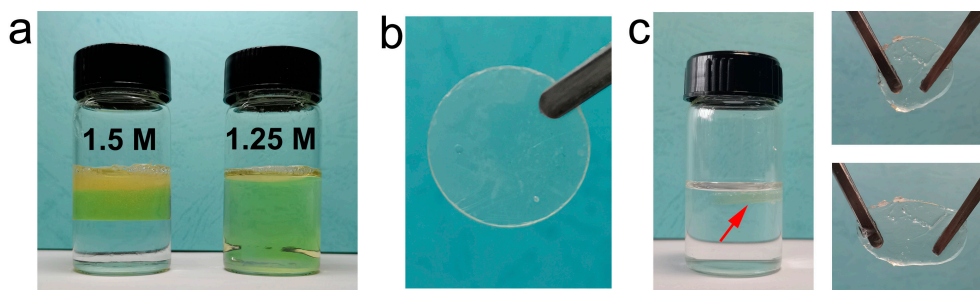

**Figure S2.** The gelatin solutions with 1.5 or 1.25 M  $\text{ZnSO}_4$  solutions. The modified layer before (b) and after immersing (c) in 2 M  $\text{ZnSO}_4$  solution.

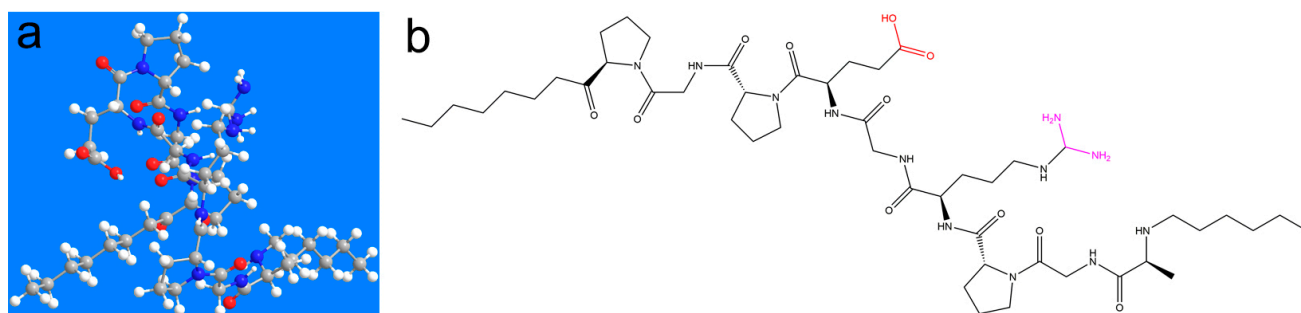

**Figure S3.** (a) 3D and (b) 2D models of one of the gelatin molecules [3].

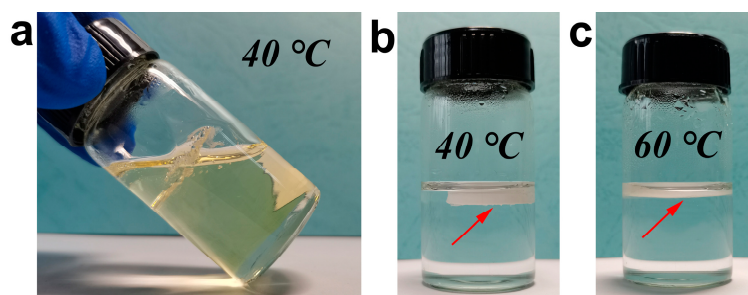

**Figure S4.** (a) The solid gelatin electrolyte at 40 °C. The Gel that immersed in 2 M  $\text{ZnSO}_4$  electrolyte at 40 °C (b) and 60 °C (c).

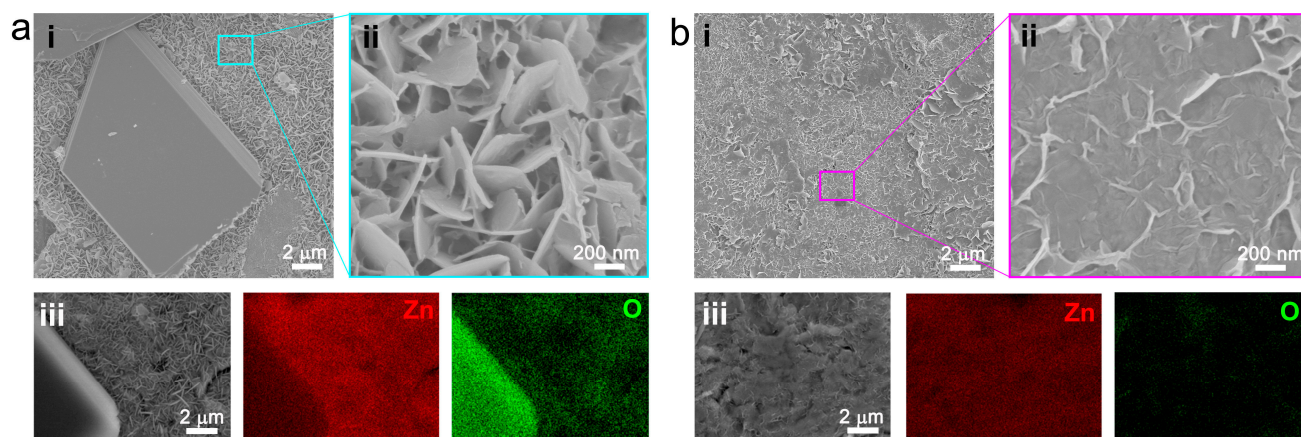

**Figure S5.** SEM images and corresponding EDS mappings after immersing Zn (a) and Zn@QLI (b) into 2 M  $\text{ZnSO}_4$  electrolyte for 8 days.

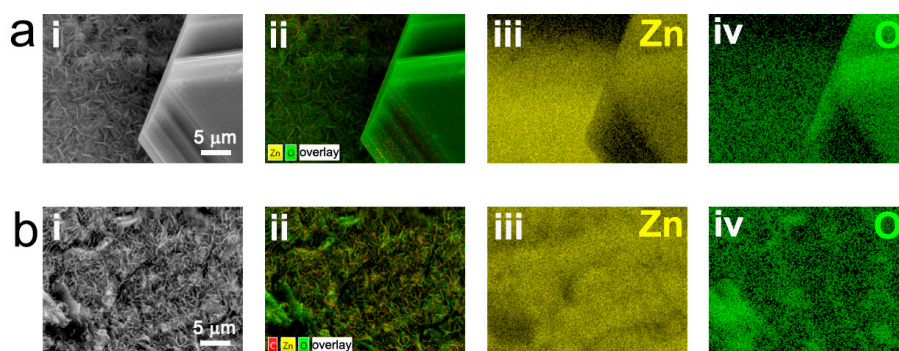

**Figure S6.** The EDS mappings after immersing Zn (a) and Zn@QLI (b) into 2 M ZnSO<sub>4</sub> electrolyte for 16 days.

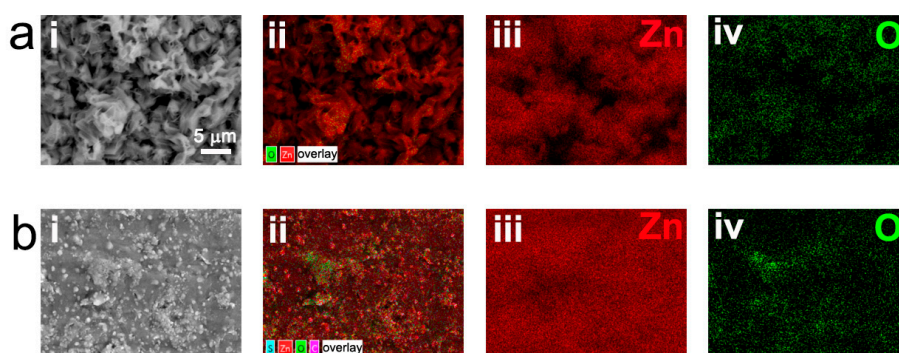

**Figure S7.** The EDS mappings of the surfaces after CA test for Zn (a) and Zn@QLI (b).

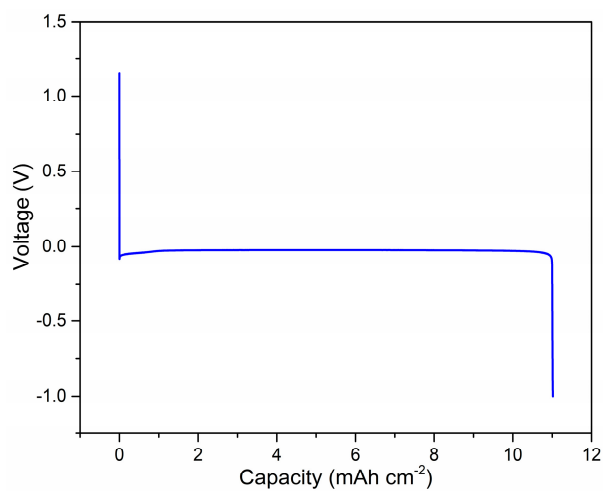

**Figure S8.** The discharge curve of Cu-Zn half cell, indicating the capacity of 20  $\mu\text{m}$  Zn foil is  $\sim 11 \text{ mAh cm}^{-2}$ .



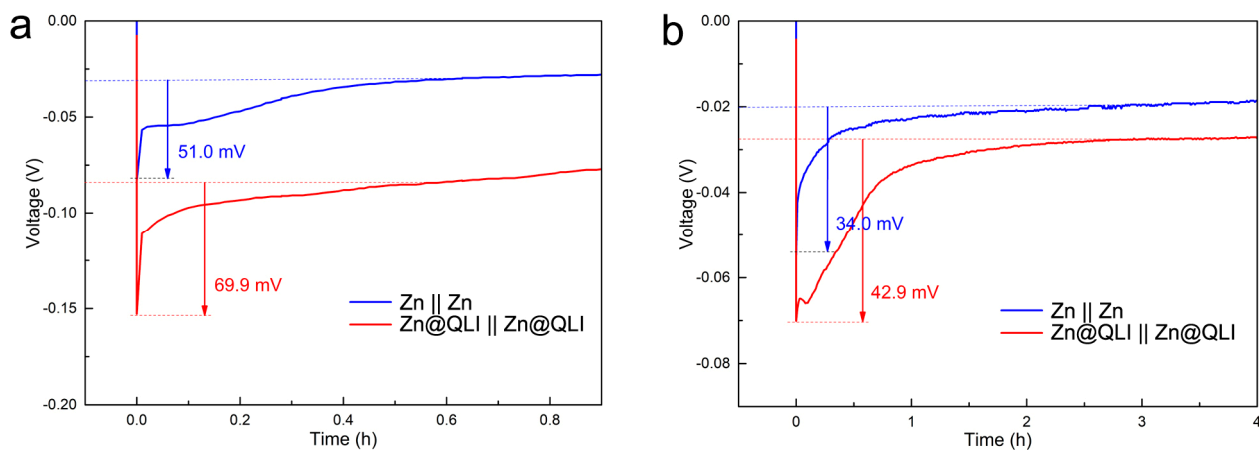

**Figure S9.** The nucleation overpotentials of Zn and Zn@QLI at a current density of 1 mA cm<sup>-2</sup> (a) and 0.2 mA cm<sup>-2</sup> (b).

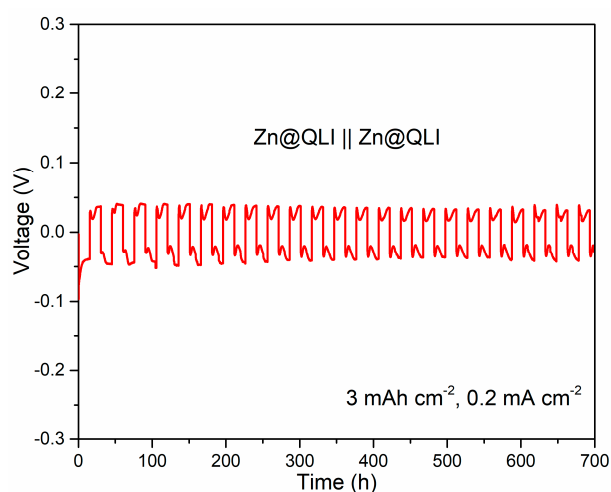

**Figure S10.** Galvanostatic cycling of the symmetric cell with Zn@QLI with a capacity of 3 mAh cm<sup>-2</sup> at 0.2 mA cm<sup>-2</sup>.

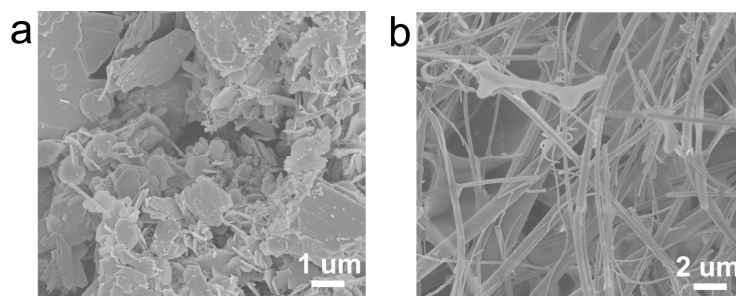

**Figure S11.** SEM images of the Zn (a) and Zn@QLI electrode (b) in the stripped state, after cycling for 100 h with a capacity of 1 mAh cm<sup>-2</sup> at 0.2 mA cm<sup>-2</sup>.

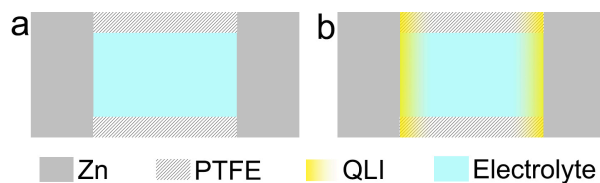

**Figure S12.** The cell configurations of the symmetric cell without separators for Zn (a) and Zn@QLI electrode (b).

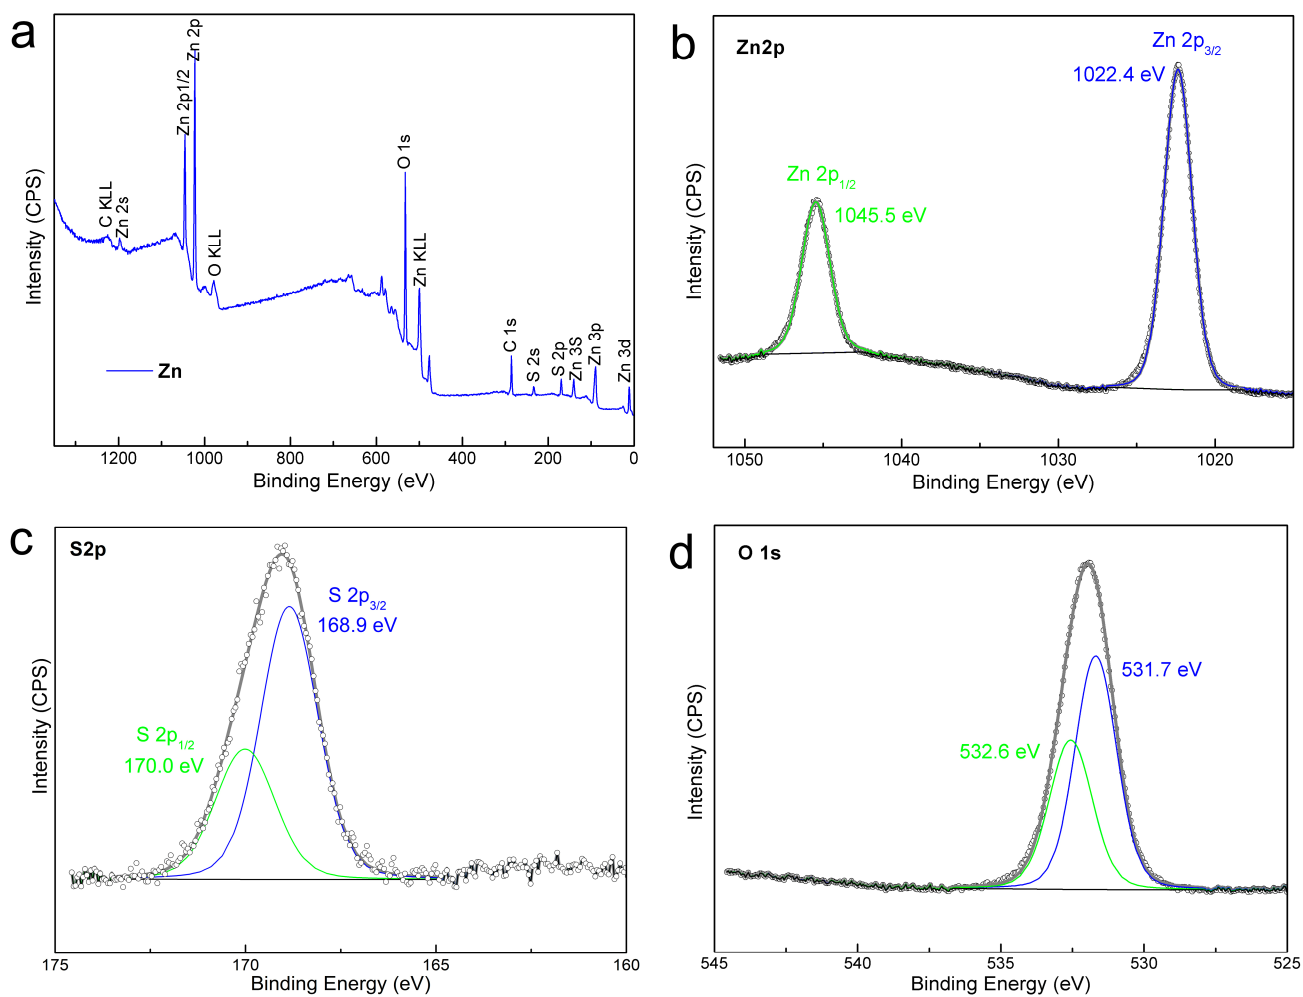

**Figure S13.** (a) XPS survey spectra of the bare Zn electrode after 30 h cycles with the symmetric cells without separators. The corresponding Zn 2p spectrum (b), S 2p spectrum (c) and O 1s spectrum (d).

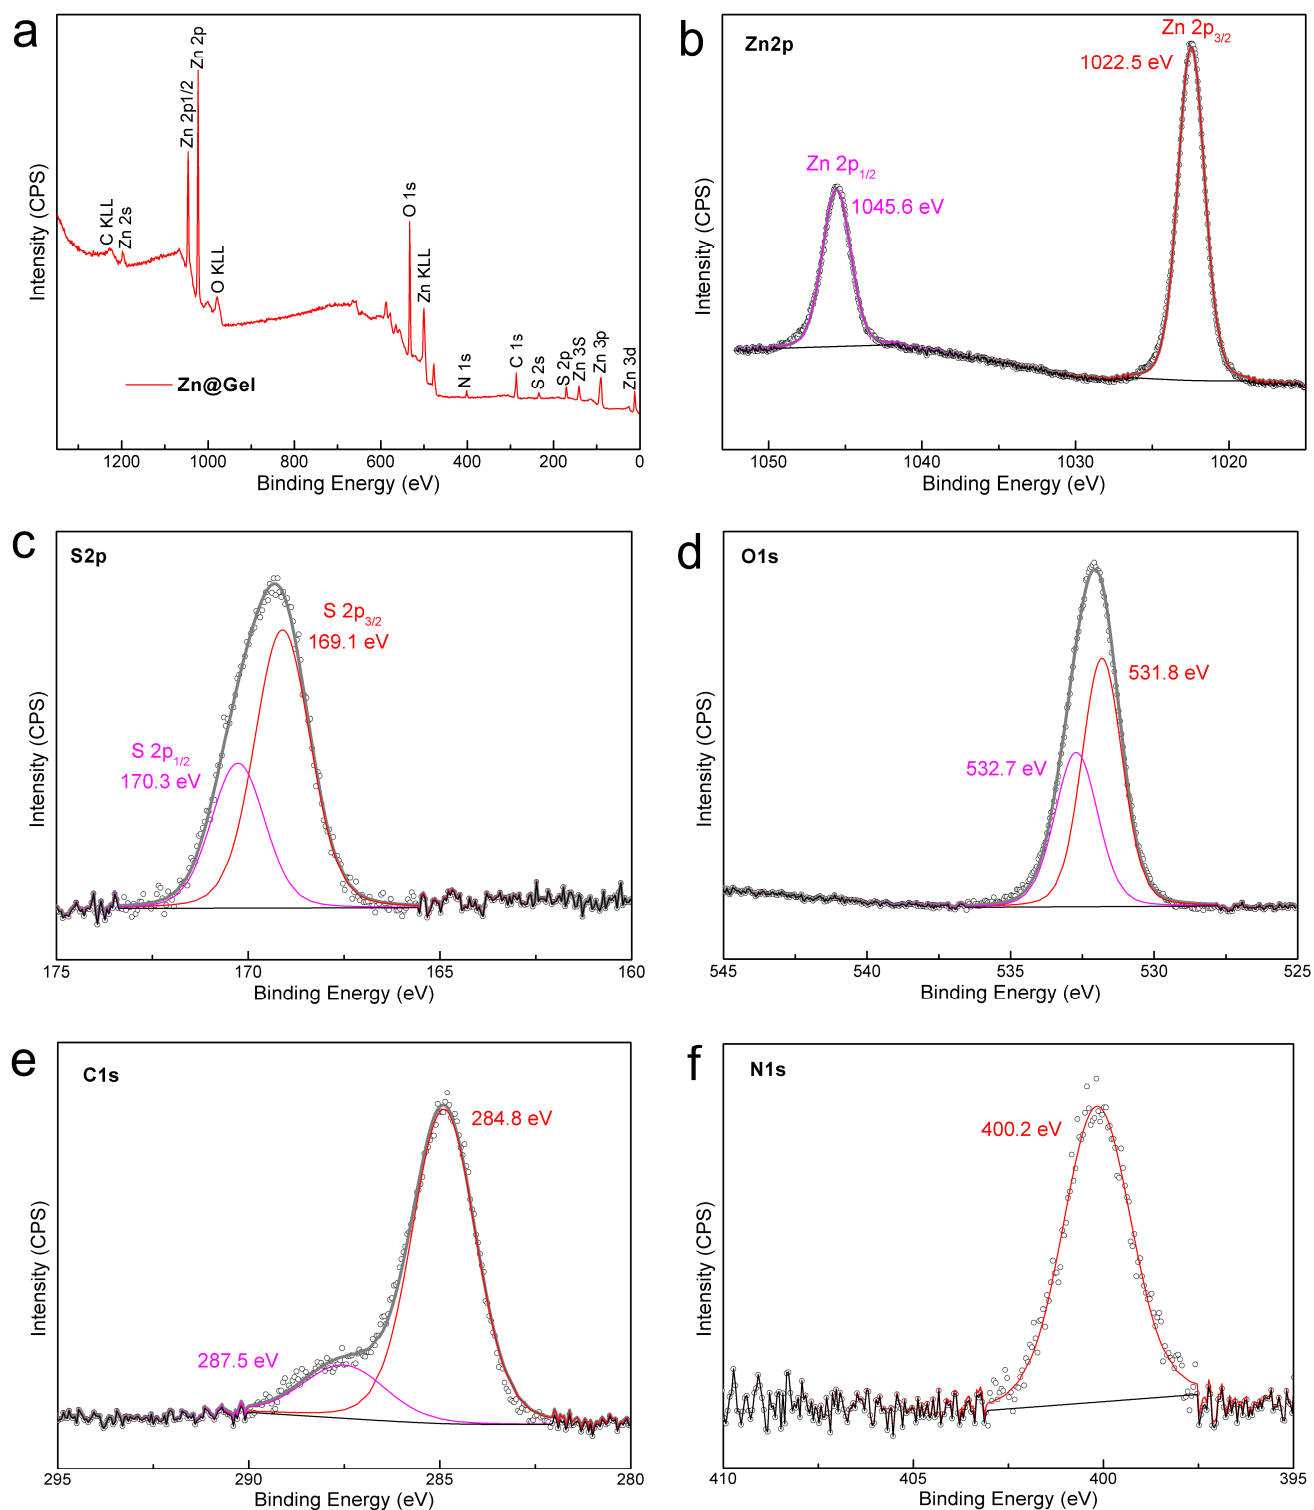

**Figure S14.** (a) XPS survey spectra of the Zn@QLI electrode after 30 h cycles with the symmetric cells without separators. The corresponding Zn 2p spectrum (b), S 2p spectrum (c), O 1s spectrum (d), C 1s spectrum (e) and N 1s spectrum (f).

The XPS survey spectra of both the Zn (Figure S13a) and the Zn@QLI electrode (Figure S14a) confirm the composition of element Zn, S and O. Figure S13b-c show the Zn 2p, S 2p and O 1s spectra of the cycled Zn electrode. The 2p orbital is split into two distinct peaks at 1022.4 and 1045.5 eV, corresponding to the 2p<sub>3/2</sub> and 2p<sub>1/2</sub> of Zn<sup>2+</sup>, respectively. The S 2p peaks at 168.9 and 170.0 eV are assigned to multiplet-split 2p<sub>3/2</sub> and 2p<sub>1/2</sub> of sulfate species, which is consistent with the result of XRD. The O 1s peaks at 531.7 and 532.6 eV represent two oxygen environments in sulfate species. As shown in Figure S14b-d, the cycled Zn@QLI exhibits similar Zn 2p, S 2p and O 1s spectra compared to the Zn electrode. Although the QLI has been removed, a new C 1s peak at 287.5 eV and a new N 1s peak at 400.2 eV appear (Figure S14e and f), which can be attributed to the residual of the QLI.

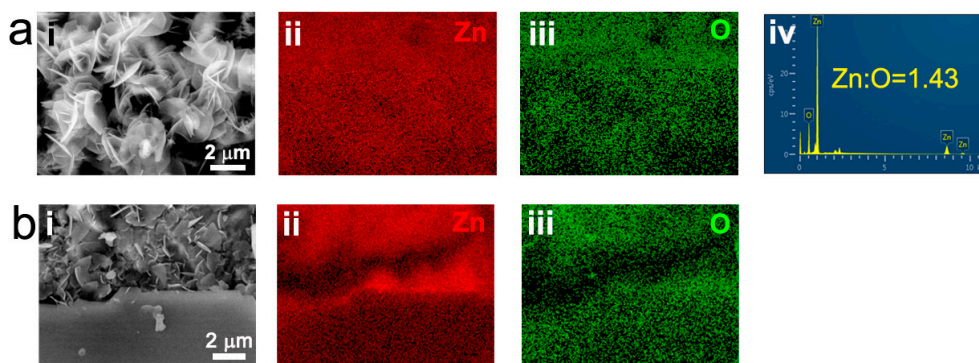

**Figure S15.** EDS mappings of the Zn electrode in the symmetric cell without separators after 30 h cycles. The particle (a) and flat area (b) corresponding to Figure 4c.

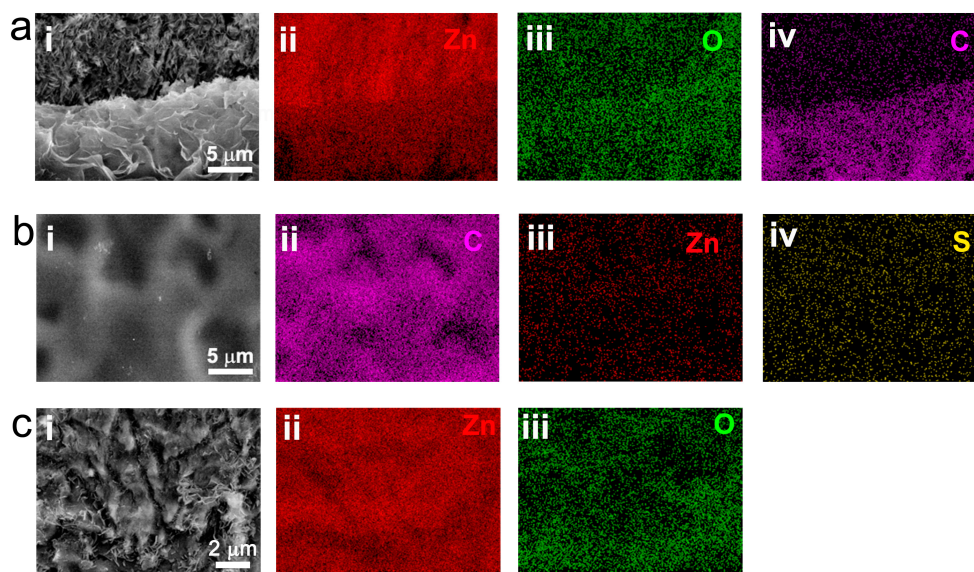

**Figure S16.** EDS mappings of the Zn@QLI electrode in the symmetric cell without separators after

30 h cycles. The QLI edge (a), QLI (b) and the area under QLI (c) corresponding to Figure 4d.

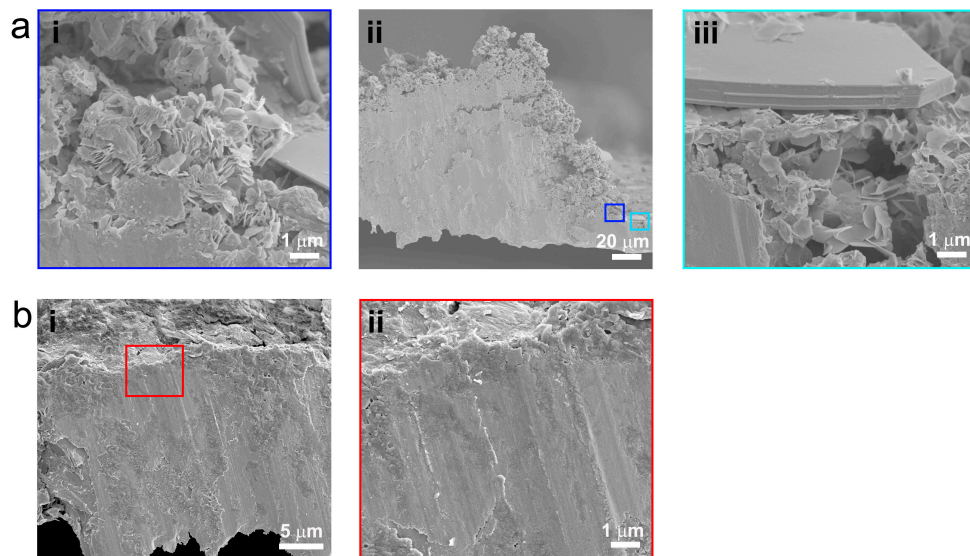

**Figure S17.** SEM images of Zn (a) and Zn@QLI electrode (b) after cycles in the cross-section view.

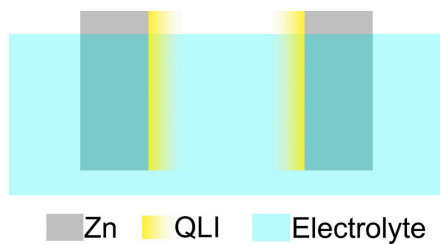

**Figure S18.** The cell configurations of the symmetric cell with suspended Zn@QLI electrodes.



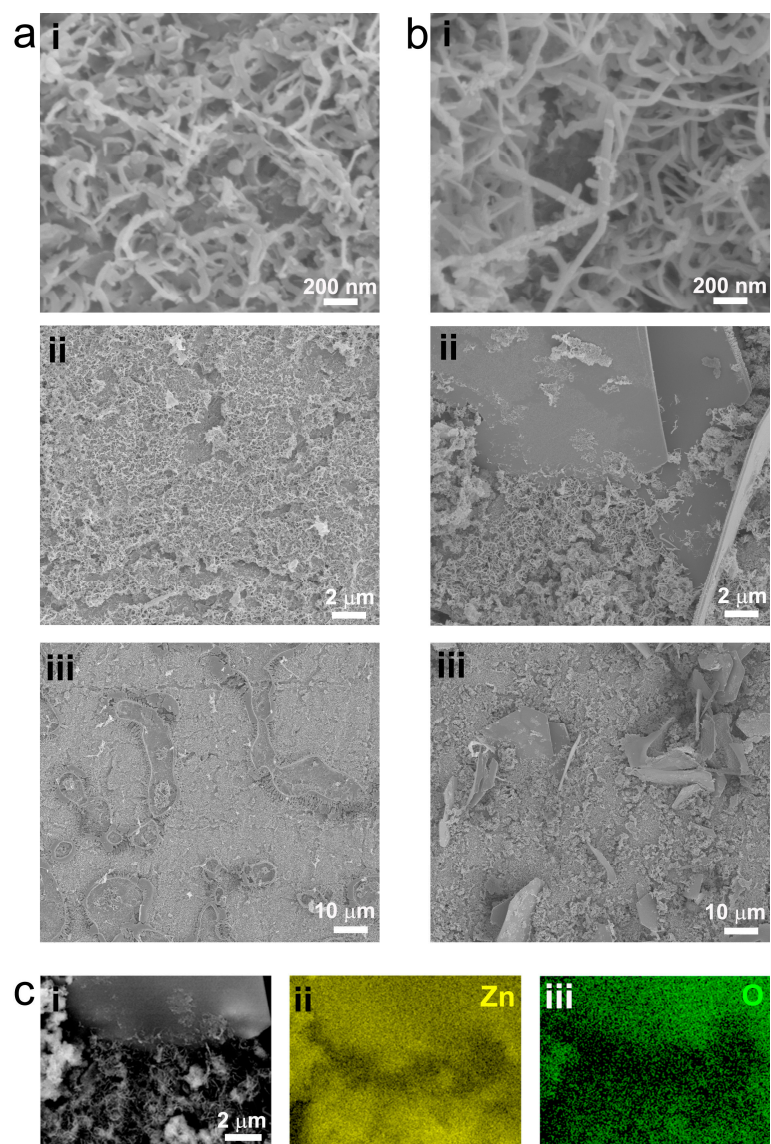

**Figure S19.** SEM images of the cycled bare Zn after 30 h in the plated state (a) and stripped state (b). (c) The corresponding EDS mappings in b.

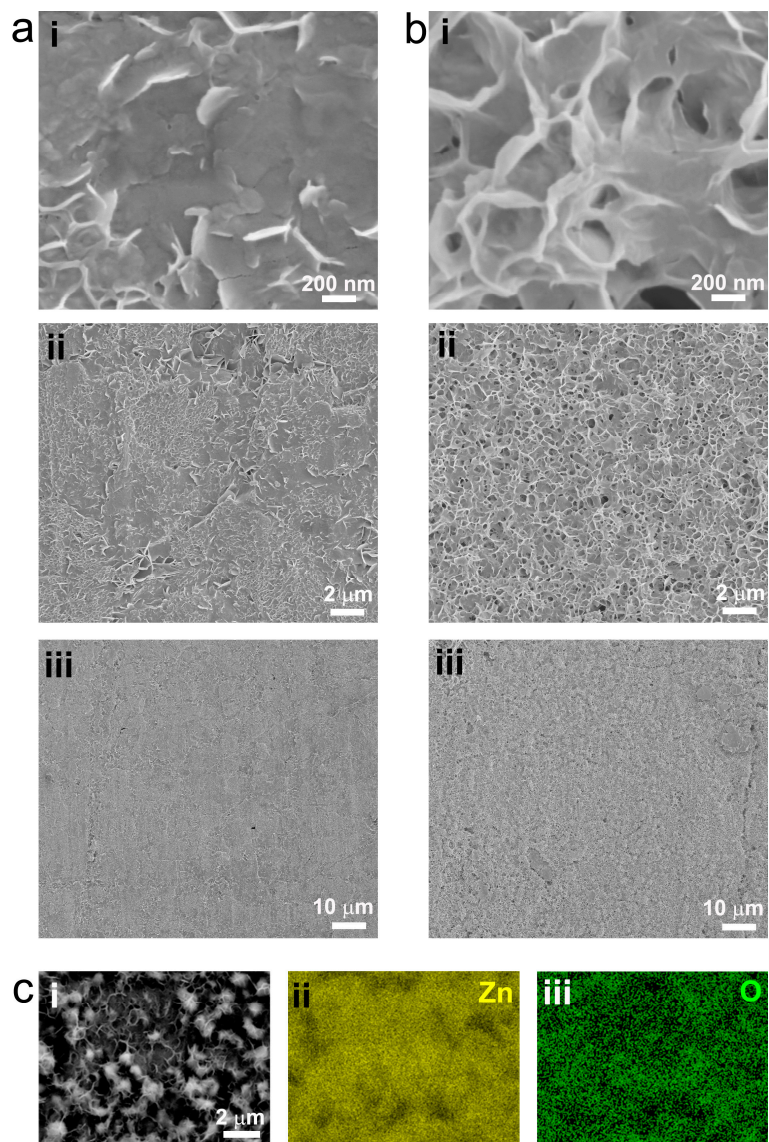

**Figure S20.** SEM images of the cycled Zn@QLI anode after 30 h in the plated state (a) and stripped state (b). (c) The corresponding EDS mappings in b.

Figure S19a and b show the SEM images of the cycled Zn electrode after 30 h in the plated and stripped state, respectively. The surface is composed of lots of whiskers in the plated state, while some large bulks appeared in the above non-separator symmetric cell present. The bulks are assigned to zinc oxides according to the element mapping (Figure S19c). In sharp contrast, the surface of the as-deposited Zn@QLI electrode is still flat with some winkle (Figure S20a), which is very similar to the morphology obtained from the non-separator symmetric cell. In the stripped state, the surface is

rougher than that in the plated state, but still no large bulks and the distribution of element Zn and O is uniform (Figure S20b and c).

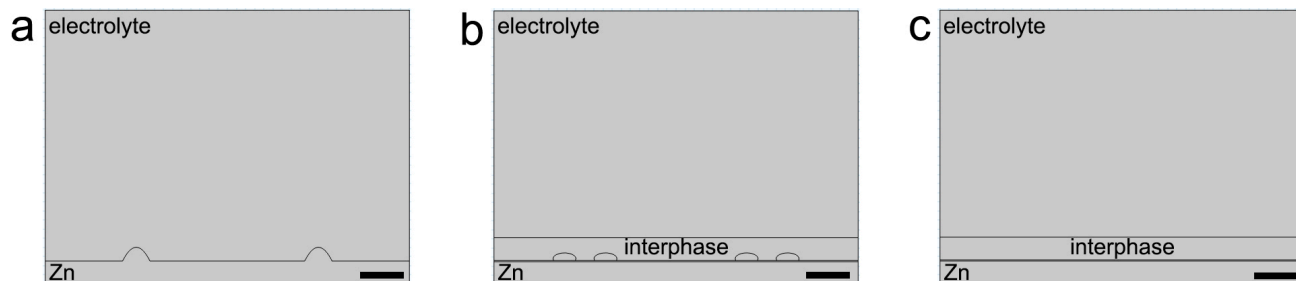

**Figure S21.** The simulation cell geometry in COMSOL for the bare Zn anode (a), Zn@elastic-SSI with electrolyte filling in the oval gap (b) and Zn@QLI (c). Scale bar: 10  $\mu\text{m}$ .

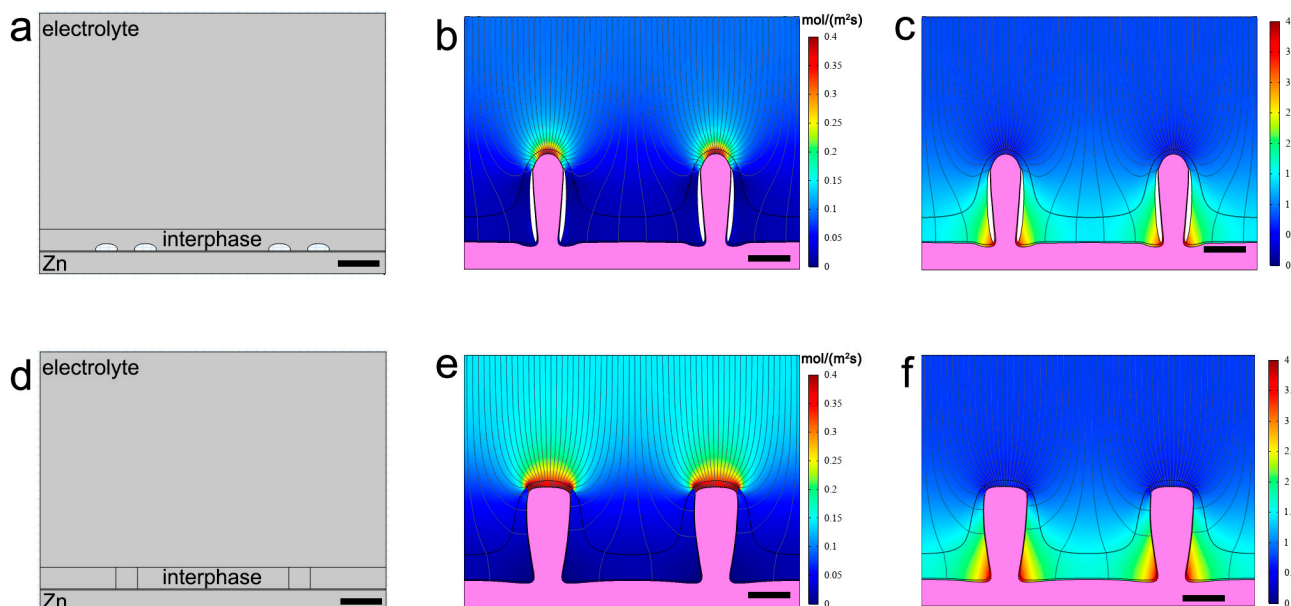

**Figure S22.** The simulation cell geometry in COMSOL for Zn@elastic-SSI with air filling in the oval gap (a) and Zn@rigid-SSI (d). Simulations of Zn deposition on Zn@elastic-SSI with air filling in the oval gap (b) and Zn@rigid-SSI (e). The color indicates the magnitude of spatial  $\text{Zn}^{2+}$  flux. Mesh element volume change during Zn deposition on Zn@elastic-SSI with air filling in the oval gap (c) and Zn@rigid-SSI (f). The color indicates the degree of volume change. In each snapshot, the streamlines display the direction of  $\text{Zn}^{2+}$  flux and the electrode is painted pink. Scale bar: 10  $\mu\text{m}$ .

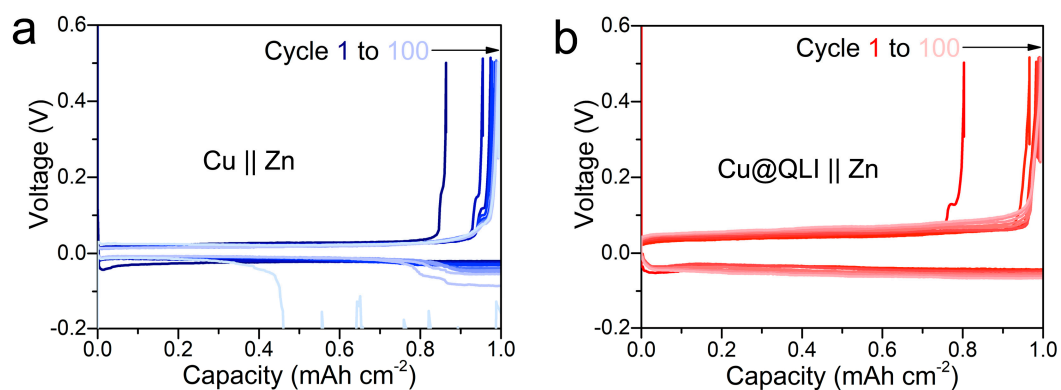

**Figure S23.** Voltage profiles of the Cu-Zn (a) and Cu@QLI-Zn half cell (b) with a capacity of 1 mAh cm<sup>-2</sup> at 1 mA cm<sup>-2</sup>.

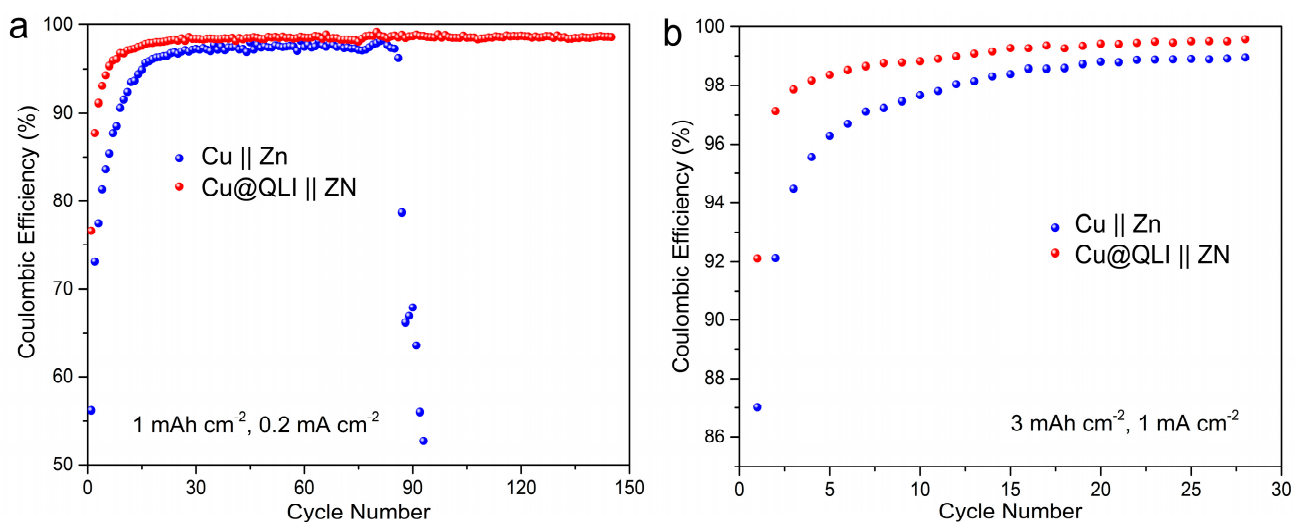

**Figure S24.** Coulombic efficiency of the half cells with a capacity of 1 mAh cm<sup>-2</sup> at 0.2 mA g<sup>-1</sup> (a) and 3 mAh cm<sup>-2</sup> at 1 mA g<sup>-1</sup> (b).

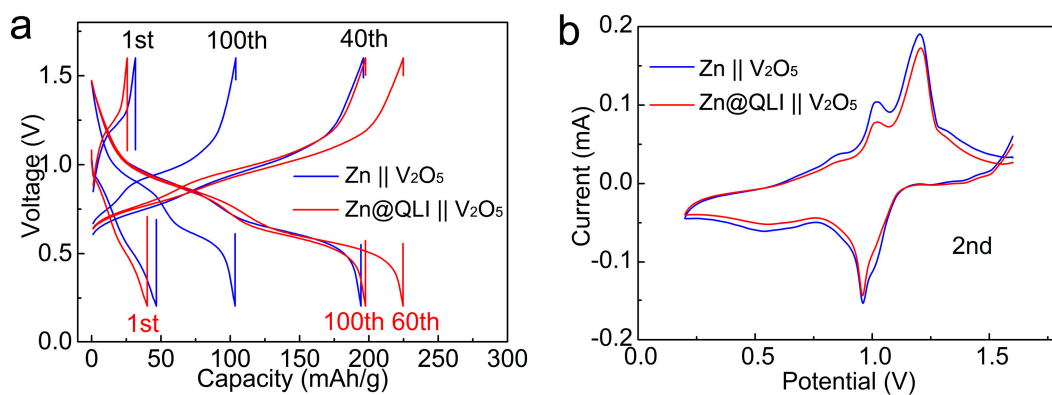

**Figure S25.** The galvanostatic voltage profiles (a) and CV curves (b) of the full cells.



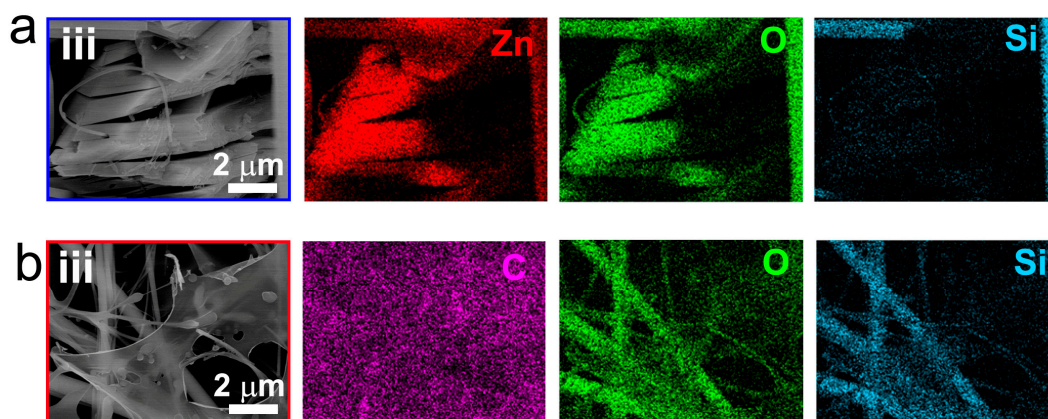

**Figure S26.** EDS mappings of the Zn (d) and Zn@QLI anode (e) after 300 cycles.

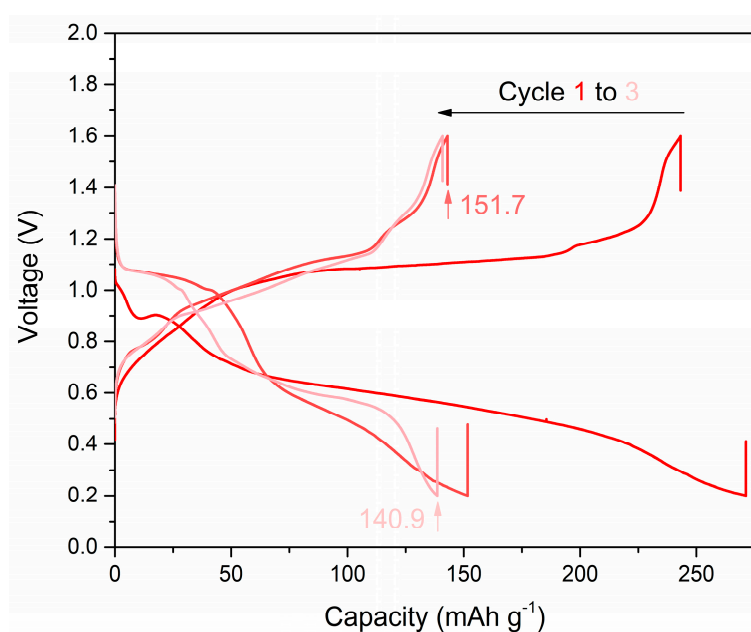

**Figure S27.** The galvanostatic voltage profiles of Zn@QLI-V<sub>2</sub>O<sub>5</sub> full cell. The current 1 is 5  $\mu$ A for cycle, and 10  $\mu$ A for cycle 2-3. The cell was rest for 3 days after cycle 2, then conducted cycle 3 to test the self-discharge performance.

## References

1. Chen, C.-H.; Pao, C.-W. Phase-field study of dendritic morphology in lithium metal batteries. *J. Power Sources* **2021**, *484*, 229203.
2. Liu, K.; Pei, A.; Lee, H. R.; Kong, B.; Liu, N.; Lin, D.; Liu, Y.; Liu, C.; Hsu, P. C.; Bao, Z.; et al. Lithium Metal Anodes with an Adaptive "Solid-Liquid" Interfacial Protective Layer. *J. Am. Chem. Soc.* **2017**, *139* (13), 4815-4820.
3. Wang, X.; Ao, Q.; Tian, X.; Fan, J.; Tong, H.; Hou, W.; Bai, S. Gelatin-Based Hydrogels for Organ 3D Bioprinting. *Polymers (Basel)* **2017**, *9* (9), 401.
